# Supplementary figures and images for: Mineral surface area in deep weathering profiles reveals the interrelationship of iron oxidation and silicate weathering
Source: Copernicus journal article supplement (doi:10.5194/esurf-2022-9), 2022-03-28

LP Well 1

144 masl 0

100

0

200

152

300

305

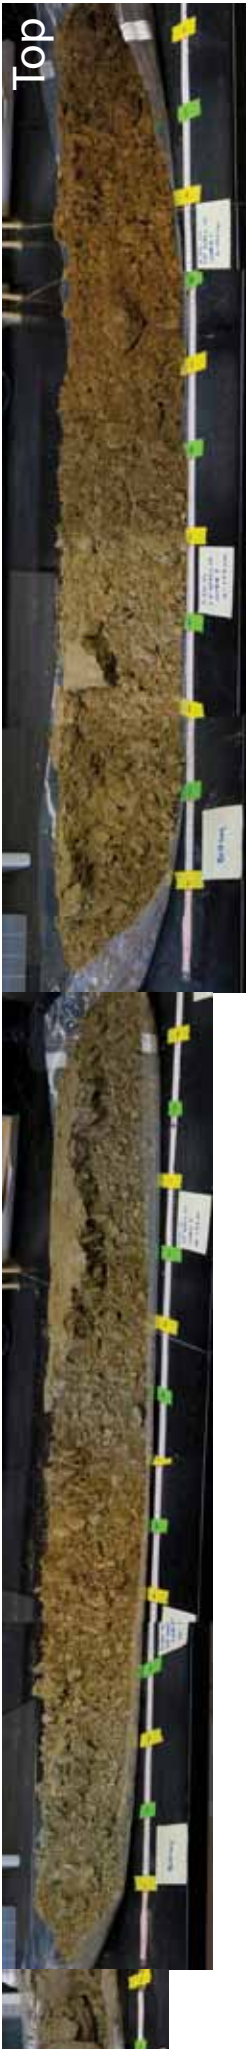

600

610

500

400

457

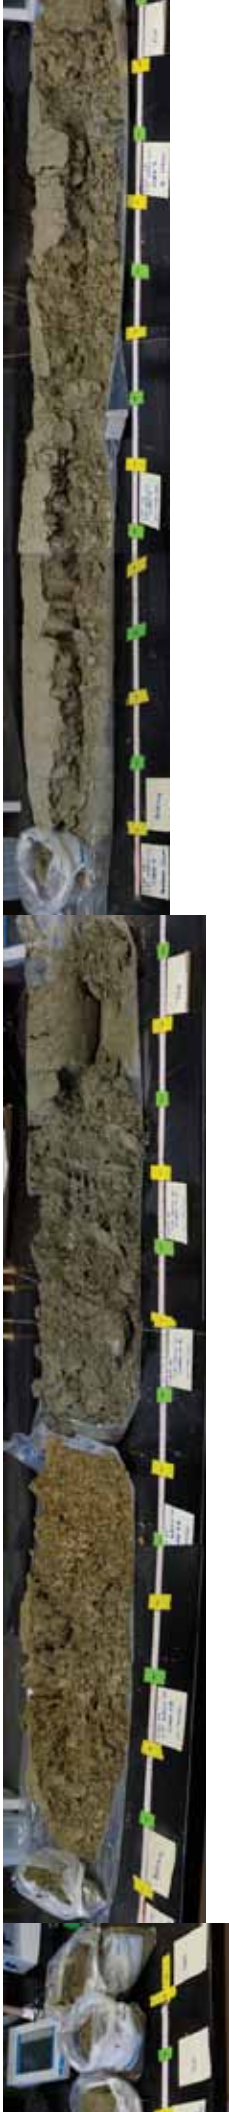

900

800

700

914

762

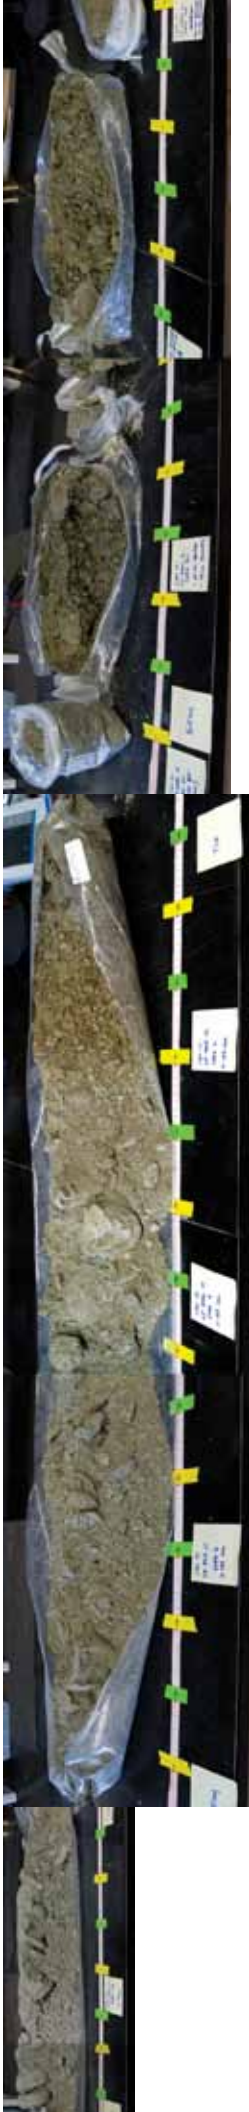

1280 1200 1100 1000 975

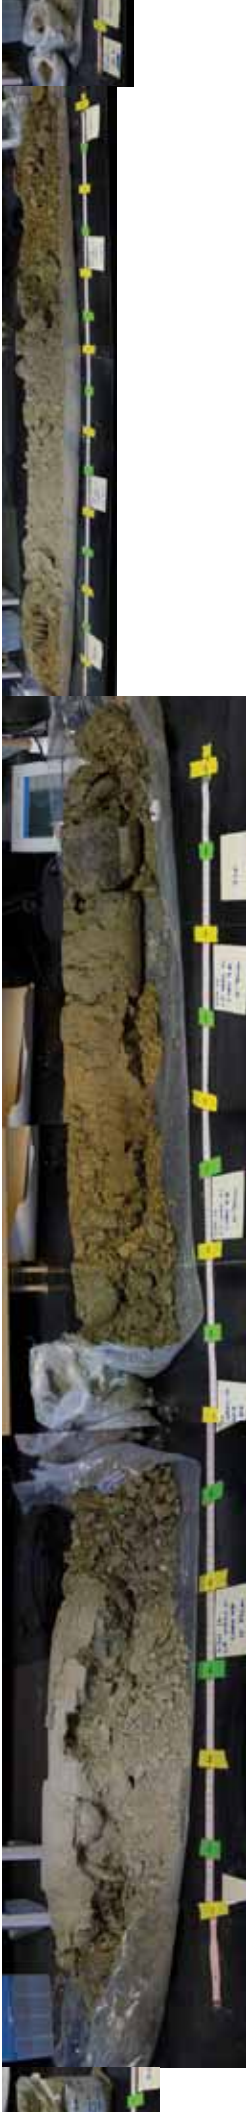

LP Well 2  
134 masl

200 100 0  
152 0

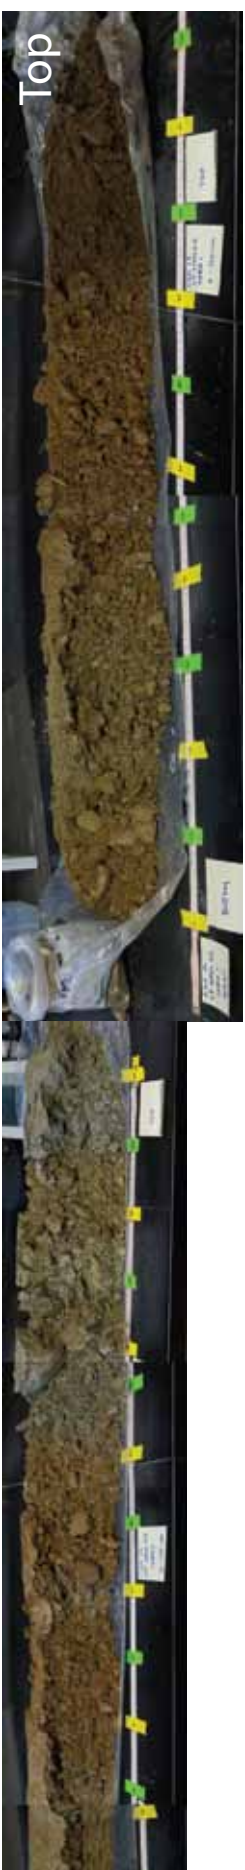

1600

1500

1400

1300

1600

1524

1372

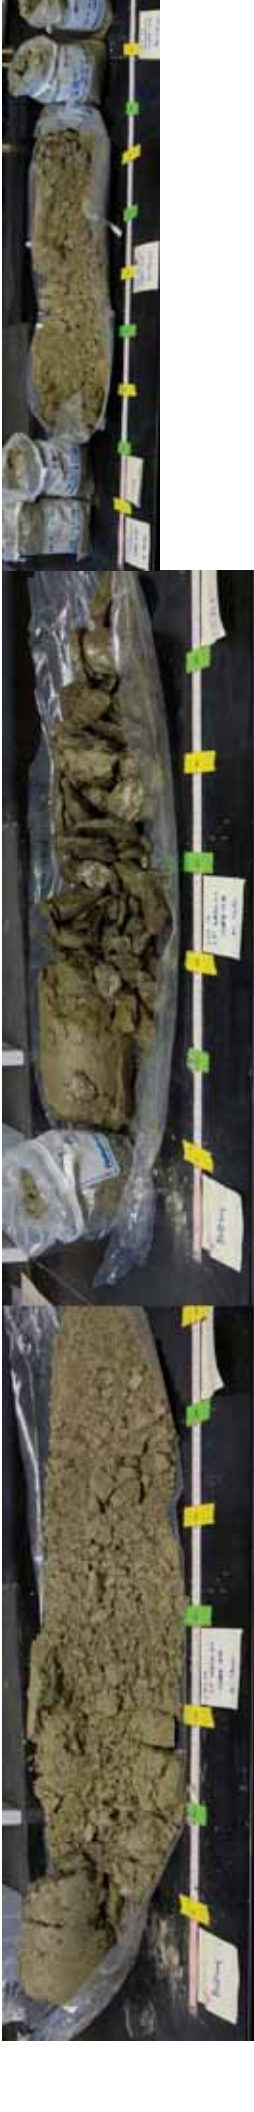

X

600

500

400

300

610

457

305

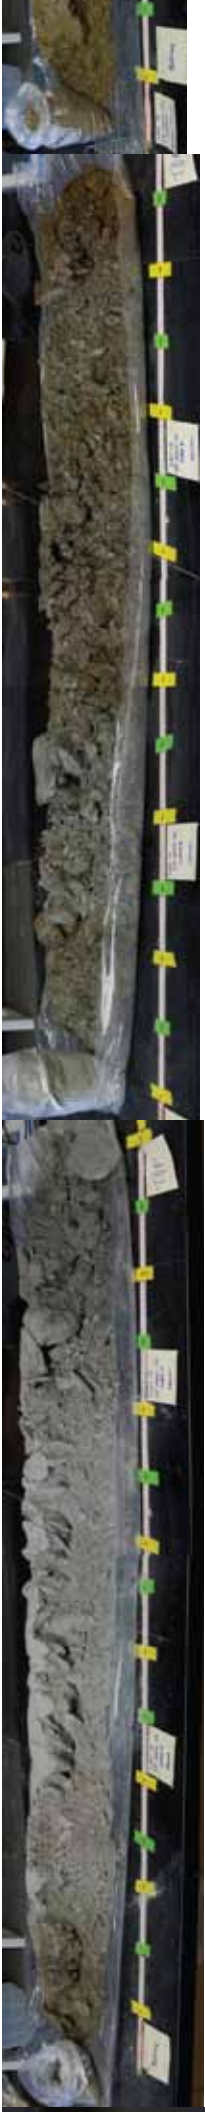



Groundwater table max

1900

1800

1700

1905

1829

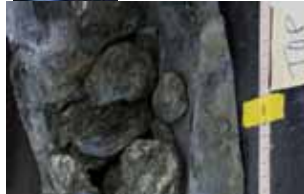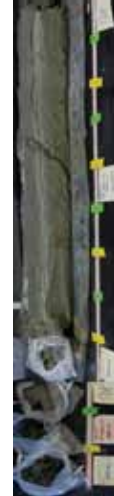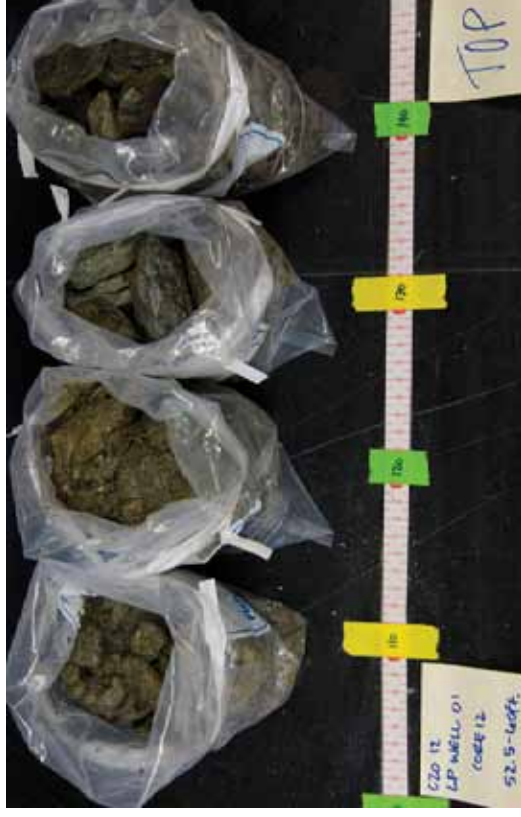

Groundwater table ma

900

800

700

914

823

762 762

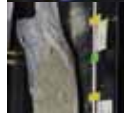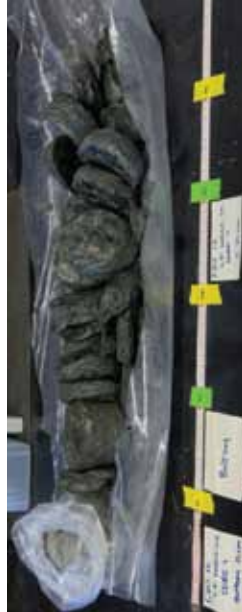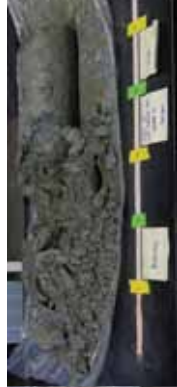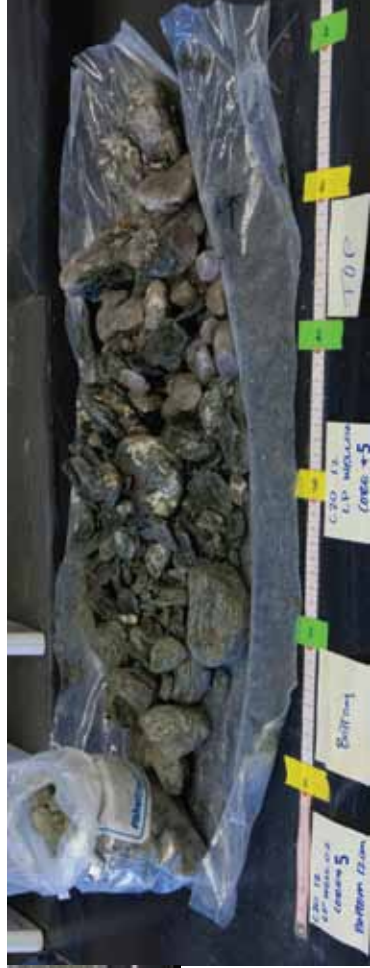

2200

2100

2000

2195

2134

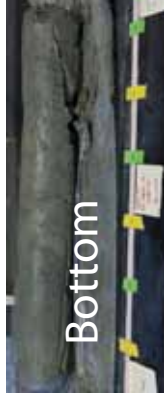

Bottom

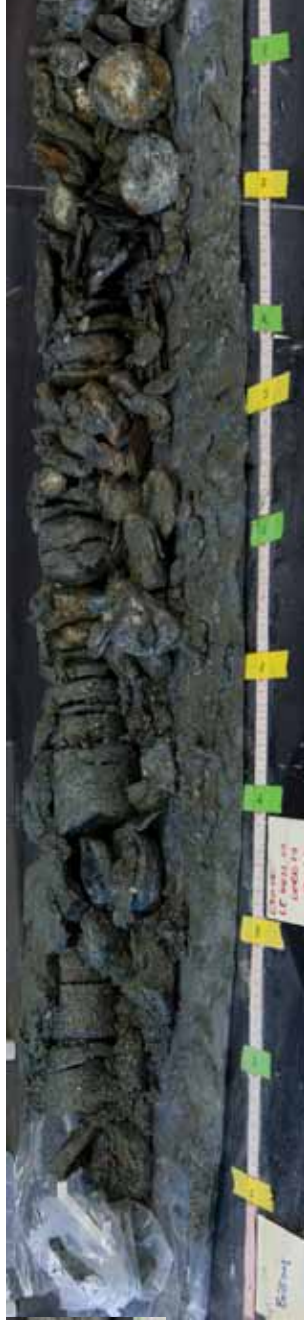

1200

1100

1000

250

1219

975

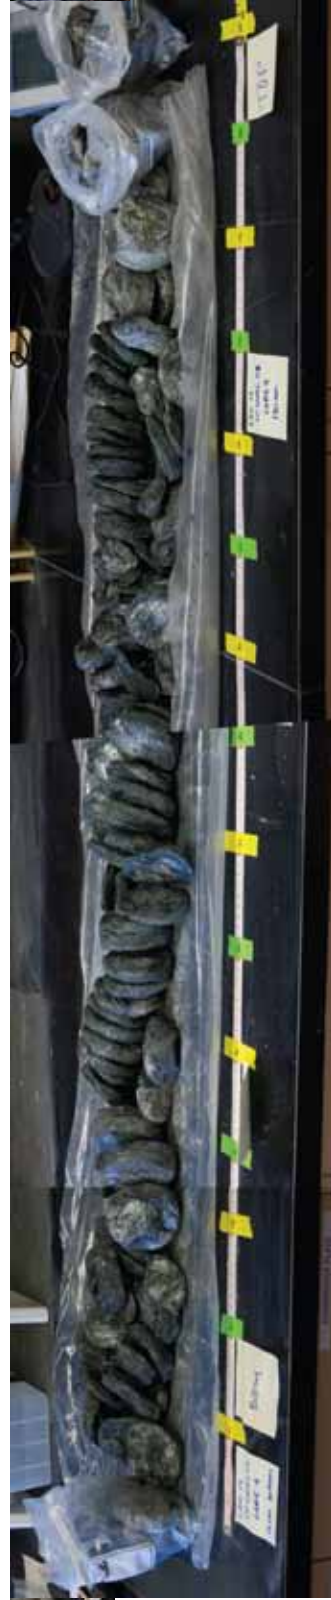

1300

1400

1500

1524

1

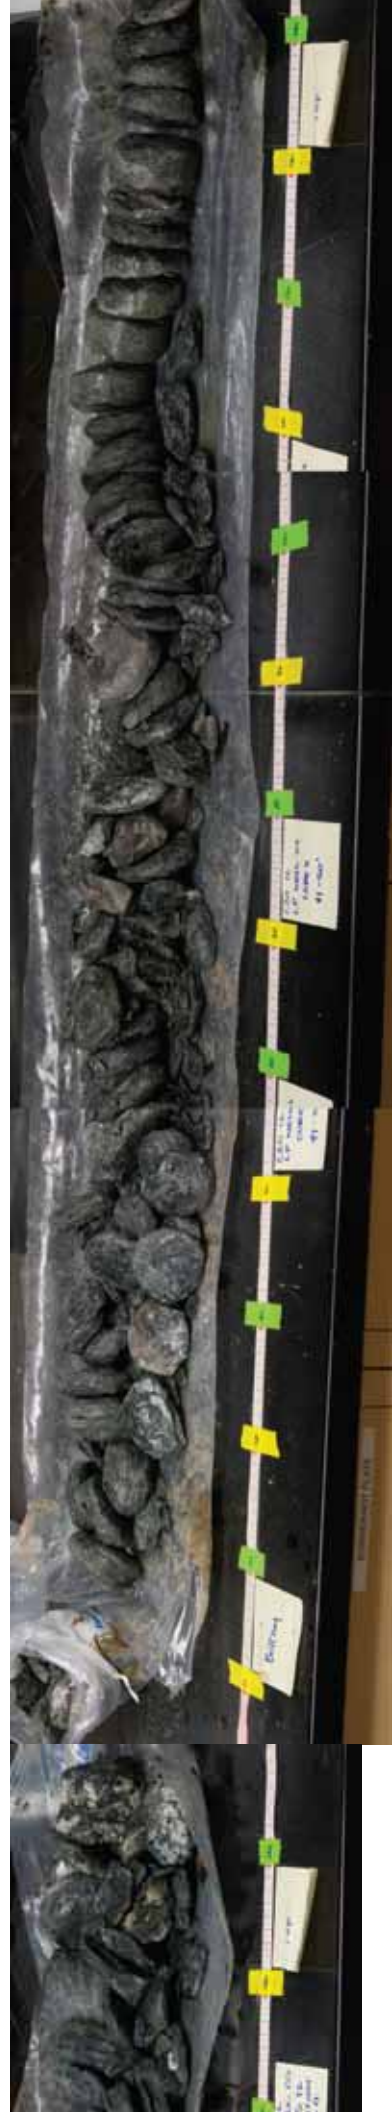



900

1800

1700

1600

1829

1600

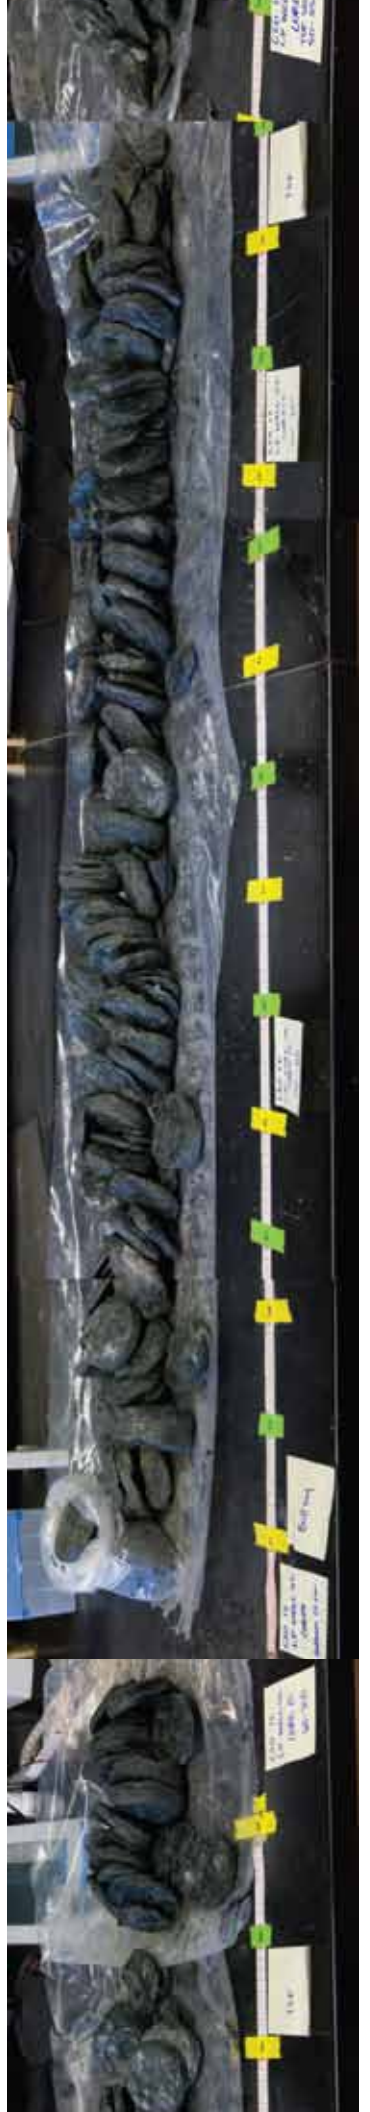

1

2000

2100

2134

Bottom

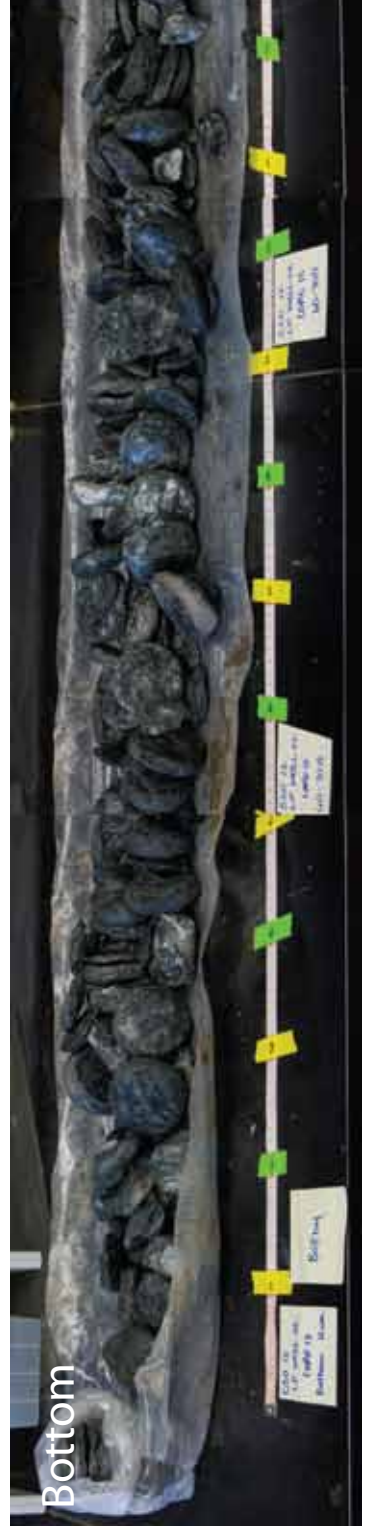

Supplement: Supplementary file 1 [file esurf-2022-9-supplement-version3.zip]
